# Supplementary material for: Improved prognosis of extranodal NK/T cell lymphoma, nasal type of nasal origin but not extranasal origin
Source: Springer Nature journal article supplement (doi:10.1007/s00277-019-03689-9), 2019-04-19
Supplement: MOESM1 [file 16666240]

**Supplemental Document S1. Participating institutes in this study**

Tohoku University, Akita University, Gunma University, Saitama Cancer Center, International Medical Center-Saitama Medical University, National Cancer Center Hospital, Showa University, Cancer Institute Hospital, Yokohama City University Hospital, Kanagawa Cancer Center, Tokai University, Niigata University, Kanazawa Medical University, Shinshu University, Nagaoka Red Cross Hospital, Nagoya University, Nagoya City University, Toyota Kosei Hospital, Mie University, Shiga Medical Center for Adults, Kyoto Daini Red Cross Hospital, Kobe University, Hyogo Cancer Center, Nara Medical University, Tottori Prefectural Central Hospital, Shimane University, Kurashiki Central Hospital, Kawasaki Medical School, National Hospital Organization Kyushu Cancer Center, Saga University, and Kumamoto City Hospital.
